# Supplementary material
Source: ML conference proceedings conference paper supplement (https://proceedings.neurips.cc/paper_files/paper/2022/hash/2f0435cffef91068ced08d7c7d8e643e-Abstract.html)
Supplement: Supplementary file 1 [file 2f0435cffef91068ced08d7c7d8e643e-Supplemental-Conference.zip]

Archive with 8 entries (7 files):
- GULP_supplementary/
- __MACOSX/._GULP_supplementary
- GULP_supplementary/GULP_revision_supp.pdf
- __MACOSX/GULP_supplementary/._GULP_revision_supp.pdf
- GULP_supplementary/.DS_Store
- __MACOSX/GULP_supplementary/._.DS_Store
- GULP_supplementary/GULP-code.zip
- __MACOSX/GULP_supplementary/._GULP-code.zip
